# Supplementary material for: Supplementary delta-rod configurations provide superior stiffness and reduced rod stress compared to traditional multiple-rod configurations after pedicle subtraction osteotomy: a finite element study
Source: Springer Nature journal article supplement (doi:10.1007/s00586-019-06012-2), 2019-05-25
Supplement: MOESM1 [file 16750638]

Table S1. Maximum von Mises stress (MPa) change in accessory rods in pre-fracture condition.

|  | Flexion | Extension | Right Lateral bending | Left Lateral bending | Right Axial rotation | Left Axial rotation |
| --- | --- | --- | --- | --- | --- | --- |
| 2S | 129.55 | 64.13 | 97.26 | 97.26 | 95.79 | 95.79 |
| 2MSA | 102.83 | 48.99 | 116.75 | 116.75 | 110.07 | 110.07 |
| 2MLA | 187.06 | 60.76 | 140.83 | 140.83 | 134.69 | 134.69 |
| 1DC | 105.22 | 55.69 | 73.41 | 90.67 | 128.72 | 75.32 |
| 2DC | 100.04 | 56.41 | 86.32 | 86.32 | 130.81 | 130.81 |
| 2D | 109.12 | 54.49 | 90.03 | 90.03 | 99.1 | 99.1 |

Table S2. Maximum von Mises stress (MPa) change in accessory rods in post-fracture condition.

|  | Flexion | Extension | Right Lateral bending | Left Lateral bending | Right Axial rotation | Left Axial rotation |
| --- | --- | --- | --- | --- | --- | --- |
| 2S | 141.92 | 93.59 | 107.77 | 124.52 | 106.73 | 121.96 |
| 2MSA | 110.5 | 54.2 | 74.33 | 82.14 | 82.41 | 103.85 |
| 2MLA | 198.75 | 68.41 | 122.35 | 153.97 | 150.7 | 138.37 |
| 1DC | 120.88 | 70.91 | 91.7 | 124.85 | 122.48 | 104.43 |
| 2DC | 123.73 | 90.79 | 99.17 | 105.35 | 159.41 | 115.61 |
| 2D | 130.06 | 80.42 | 124.8 | 85.31 | 145.3 | 133.49 |
